# Supplementary material for: Multifunctional gold nanorods for selective plasmonic photothermal therapy in pancreatic cancer cells using ultra-short pulse near-infrared laser irradiation
Source: Royal Society of Chemistry journal article supplement (doi:10.1039/c5nr00114e), 2015-01-01
Supplement: c5nr00114e1.pdf [file c5nr00114e1.pdf]

## Supporting Information

### **Multifunctional Gold Nanorods for Selective Plasmonic Photothermal Therapy in Pancreatic Cancer Cells Using Ultra-Short Pulse Near-Infrared Laser Irradiation**

Tania Patino,<sup>a</sup> Ujjwal Mahajan,<sup>b</sup> Raghavendra Palankar,<sup>\*,a</sup> Nikolay Medvedev,<sup>a</sup> Jakob  
Walowski,<sup>c</sup> Markus Münzenberg,<sup>c</sup> Julia Mayerle,<sup>b</sup> Mihaela Delcea<sup>\*,a</sup>

\*E-mail: [palankarr@uni-greifswald.de](mailto:palankarr@uni-greifswald.de); [delceam@uni-greifswald.de](mailto:delceam@uni-greifswald.de)

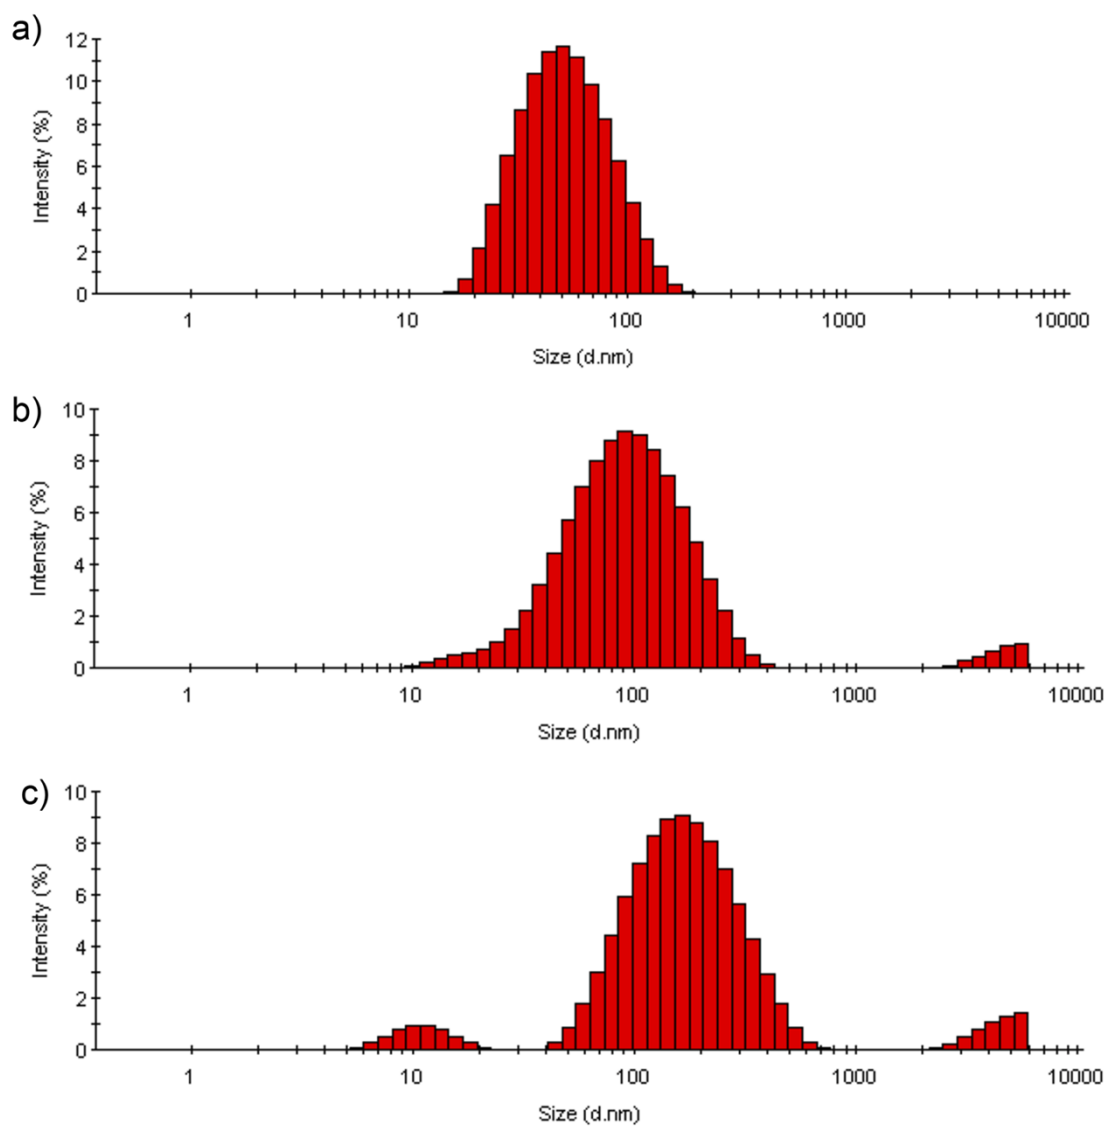

**Fig. S1.** Size distribution histograms of hydrodynamic diameter (measured by DLS) of CTAB stabilized AuNRs (a), Biotin-PEG-Thiol functionalized AuNRs (b), and TR-AV functionalized AuNRs (c).

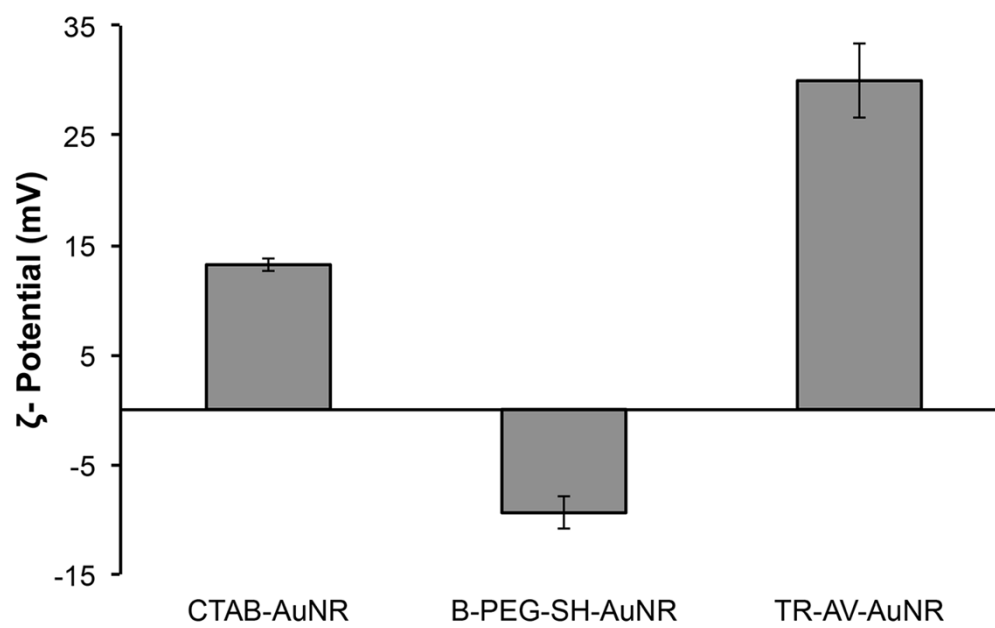

**Fig.S2.** ζ-potential of functionalized- and CTAB-stabilized AuNRs.

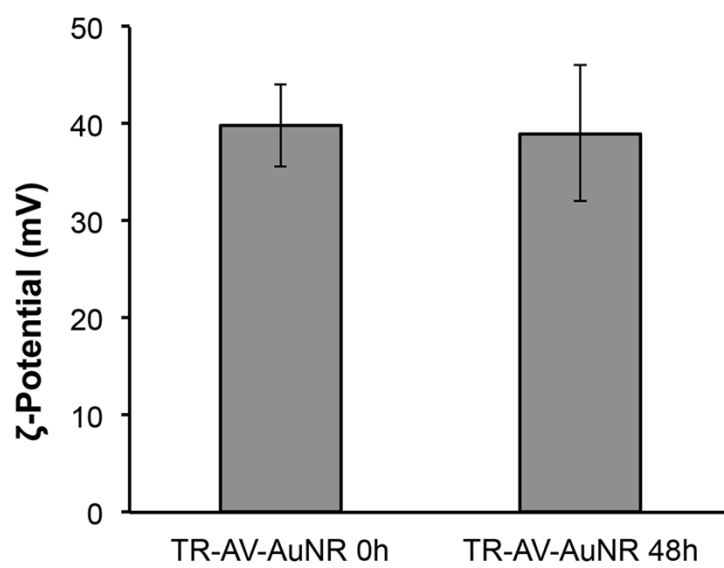

**Fig. S3.** ζ-potential of TR-AV functionalized AuNRs after 48h of storage at 4°C.

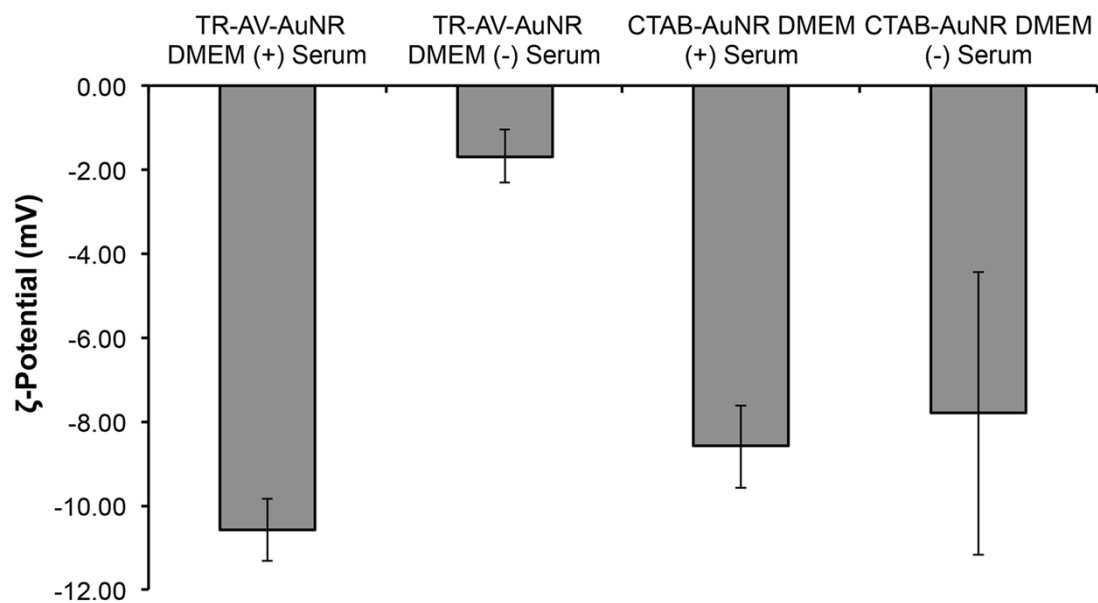

**Fig. S4.** ζ-potential of TR-AV functionalized AuNRs and AuNRs stabilized with CTAB resuspended in DMEM either with or without serum.

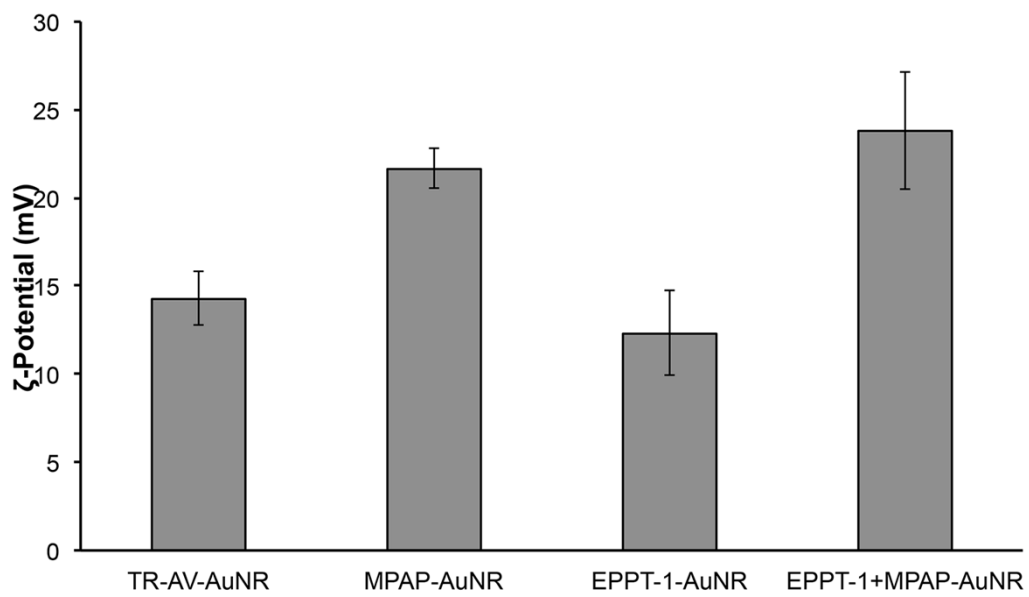

**Fig. S5.**  $\zeta$ -Potential of peptide-conjugated AuNRs measured in ultrapure water.

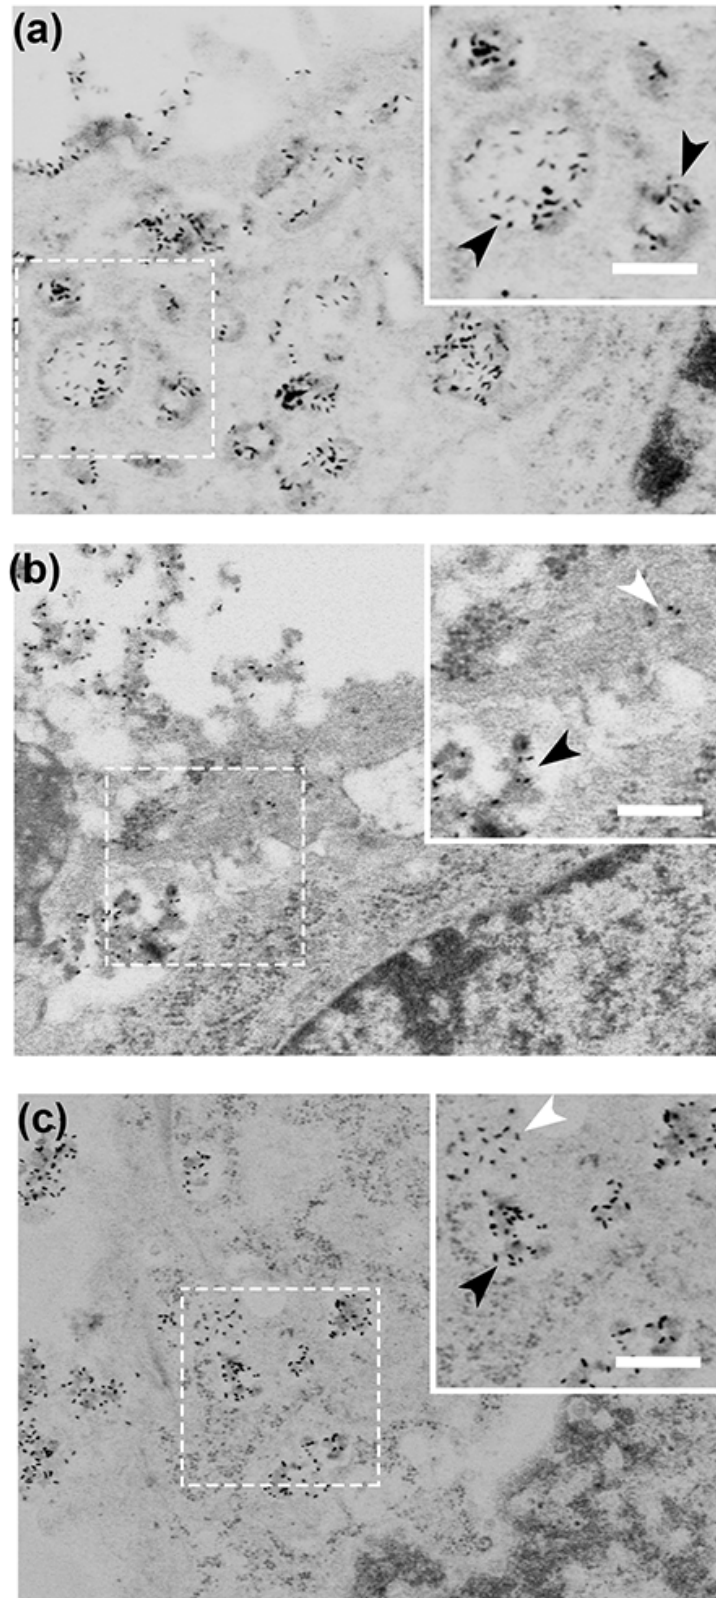

**Fig. S6.** STEM micrographs of AuNRs intracellular localization. 6606PDA cells were incubated with a) EPPT1, b) MPAP, and c) EPPT1+MPAP peptide-conjugated AuNRs for 4h. Black and white arrowheads indicate vesicle-like structures surrounding the AuNRs and cytosolic distribution of AuNRs, respectively. Scale bars = 250 nm.
